# Supplementary material
Source: Springer Nature journal article supplement (https://www.springermedizin.de/resource/supplementary/13063_2011_956_MOESM1_ESM.pdf/9618740)
Supplement: MOESM1 [file 9618740]

Chronically diseased and mobility restricted community-dwelling GP patients aged  $\geq 70$  years

N=210

**Recruitment**

Patient records are assessed for eligibility

Invitation of patients to GP's practice for final assessment of eligibility

Patient information by GP and exercise therapist

Patient providing written informed consent

**Baseline Assessment T0**

Telephone interview  
Motor tests

R  
A  
N  
D  
O  
M  
I  
S  
A  
T  
I  
O  
N

**Experimental Intervention**

Multidimensional home-based exercise  
Consultations (personal attention, instruction,  
methods fostering behavioural change)

12 weeks

**Control Intervention**

"Baseline physical activities"  
Consultations (personal attention, instruction)

**Final Assessment T1**

Telephone interview  
Motor tests
